# Supplementary material
Source: publisher figshare collection journal article supplement (https://gsajournals.figshare.com/ndownloader/files/14994911)
Supplement: Supplementary file 1 [file 14994911]

## Sheet: T15
92 genes at 4-fold change and 95% confidence
Name	Control_Time15_rep - linear total RPKM	Laser_Time15_rep - linear total RPKM	Fold change		DB_Object_Name	GO ID
Upregulated Non-ESR Genes (52)
LSO1	1.021	47.062	46.094	up	Protein with a potential role in response to iron deprivation	iron ion homeostasis GO:0055072, nucleus GO:0005634, molecular_function GO:0003674
SRX1	11.603	518.602	44.6955	up	Sulfiredoxin	oxidation-reduction process GO:0055114, cytoplasm GO:0005737, sulfiredoxin activity GO:0032542, cellular oxidant detoxification GO:0098869, nucleotide binding GO:0000166, ATP binding GO:0005524, nucleus GO:0005634, antioxidant activity GO:0016209, cellular response to oxidative stress GO:0034599, oxidoreductase activity GO:0016491
HUG1	9.556	248.41	25.9952	up	Ribonucleotide reductase inhibitor	cytoplasm GO:0005737, cellular response to DNA damage stimulus GO:0006974, cell cycle arrest GO:0007050, nucleus GO:0005634, ribonucleoside-diphosphate reductase inhibitor activity GO:1990846, DNA repair GO:0006281, regulation of ribonucleoside-diphosphate reductase activity GO:1905117, negative regulation of catalytic activity GO:0043086, DNA damage checkpoint GO:0000077
HBN1	4.454	86.565	19.4353	up	Protein of unknown function	nucleus GO:0005634; biological_process GO:0008150; cytoplasm GO:0005737; oxidoreductase activity, acting on NAD(P)H, nitrogenous group as acceptor GO:0016657; oxidation-reduction process GO:0055114; oxidoreductase activity GO:0016491; cellular response to oxidative stress GO:0034599
BTN2	15.989	279.217	17.4631	up	v-SNARE binding protein	cytoplasm GO:0005737; cytosol GO:0005829; regulation of pH GO:0006885; intracellular protein transport GO:0006886; amino acid transport GO:0006865; late endosome GO:0005770; retrograde transport, endosome to Golgi GO:0042147; nuclear periphery GO:0034399; endosome GO:0005768; SNARE binding GO:0000149; perinuclear region of cytoplasm GO:0048471; nucleus GO:0005634; protein folding GO:0006457; prot…
YKL071W	5.345	62.865	11.7615	up	Putative protein of unknown function	cytoplasm GO:0005737, integral component of membrane GO:0016021, oxidoreductase activity GO:0016491, biological_process GO:0008150, oxidation-reduction process GO:0055114, molecular_function GO:0003674
RNR3	3.245	35.298	10.8777	up	Minor isoform of large subunit of ribonucleotide-diphosphate reductase	mitochondrion GO:0005739; DNA replication GO:0006260; ribonucleoside-diphosphate reductase activity, thioredoxin disulfide as acceptor GO:0004748; cytoplasm GO:0005737; metabolic process GO:0008152; nucleotide binding GO:0000166; ATP binding GO:0005524; oxidation-reduction process GO:0055114; deoxyribonucleotide biosynthetic process GO:0009263; catalytic activity GO:0003824; oxidoreductase activi…
MET17	38.718	405.614	10.4761	up	O-acetyl homoserine-O-acetyl serine sulfhydrylase	methionine metabolic process GO:0006555; pyridoxal phosphate binding GO:0030170; O-acetylhomoserine aminocarboxypropyltransferase activity GO:0003961; cytoplasm GO:0005737; methionine biosynthetic process GO:0009086; metabolic process GO:0008152; cysteine synthase activity GO:0004124; cysteine biosynthetic process GO:0019344; cysteine biosynthetic process via cystathionine GO:0019343; cellular am…
HMX1	22.742	225.453	9.91351	up	ER localized heme oxygenase	heme oxygenase (decyclizing) activity GO:0004392, heme oxidation GO:0006788, oxidation-reduction process GO:0055114, heme catabolic process GO:0042167, endoplasmic reticulum GO:0005783, membrane GO:0016020, cellular iron ion homeostasis GO:0006879, endoplasmic reticulum membrane GO:0005789, metal ion binding GO:0046872, heme binding GO:0020037, response to oxidative stress GO:0006979, nuclear out…
TIS11	20.157	176.266	8.74465	up	mRNA-binding protein expressed during iron starvation	mRNA 3'-UTR binding GO:0003730, nucleus GO:0005634, RNA binding GO:0003723, metal ion binding GO:0046872, cytoplasm GO:0005737, 3'-UTR-mediated mRNA destabilization GO:0061158, cytosol GO:0005829, P-body GO:0000932, mRNA binding GO:0003729, cellular iron ion homeostasis GO:0006879, nuclear-transcribed mRNA catabolic process GO:0000956
OYE3	3.686	29.736	8.06728	up	Conserved NADPH oxidoreductase containing flavin mononucleotide (FMN)	intracellular GO:0005622, oxidoreductase activity GO:0016491, FMN binding GO:0010181, catalytic activity GO:0003824, pentaerythritol trinitrate reductase activity GO:0018548, NADPH dehydrogenase activity GO:0003959, oxidation-reduction process GO:0055114, apoptotic process GO:0006915, cellular_component GO:0005575, trichloro-p-hydroquinone reductive dehalogenase activity GO:0052690
MHT1	3.889	30.053	7.72769	up	S-methylmethionine-homocysteine methyltransferase	methionine biosynthetic process GO:0009086, metal ion binding GO:0046872, methylation GO:0032259, methyltransferase activity GO:0008168, transferase activity GO:0016740, cytoplasm GO:0005737, cellular amino acid biosynthetic process GO:0008652, S-adenosylmethionine-homocysteine S-methyltransferase activity GO:0008898, sulfur amino acid metabolic process GO:0000096
RGI1	4.197	32.042	7.6345	up	Protein of unknown function	energy reserve metabolic process GO:0006112, nucleus GO:0005634, cytoplasm GO:0005737, plasma membrane GO:0005886, cell periphery GO:0071944, molecular_function GO:0003674, membrane GO:0016020
YJL133C-A	91.838	680.214	7.40667	up	Putative protein of unknown function	molecular_function GO:0003674, mitochondrion GO:0005739, integral component of membrane GO:0016021, mitochondrial outer membrane GO:0005741, biological_process GO:0008150, membrane GO:0016020
RIM4	1.905	13.831	7.26037	up	Putative RNA-binding protein	premeiotic DNA replication GO:0006279, sporulation resulting in formation of a cellular spore GO:0030435, RNA binding GO:0003723, nucleus GO:0005634, nucleotide binding GO:0000166, nucleic acid binding GO:0003676, meiotic cell cycle GO:0051321, reciprocal meiotic recombination GO:0007131, cytoplasm GO:0005737
IGD1	5.518	39.908	7.23233	up	Cytoplasmic protein that inhibits Gdb1p glycogen debranching activity	cytoplasm GO:0005737, negative regulation of catalytic activity GO:0043086, glycogen biosynthetic process GO:0005978, negative regulation of glycogen catabolic process GO:0045818, enzyme inhibitor activity GO:0004857
HSP82	174.502	1249.14	7.15829	up	Hsp90 chaperone	cytoplasm GO:0005737; 'de novo' protein folding GO:0006458; protein refolding GO:0042026; unfolded protein binding GO:0051082; proteasome assembly GO:0043248; response to osmotic stress GO:0006970; ATP binding GO:0005524; response to stress GO:0006950; ATPase activity, coupled GO:0042623; protein maturation GO:0051604; positive regulation of telomere maintenance via telomerase GO:0032212; nucleot…
YOL131W	1.021	7.219	7.07052	up	Putative protein of unknown function	biological_process GO:0008150, molecular_function GO:0003674, cellular_component GO:0005575
MUP3	2.877	17.92	6.22871	up	Low affinity methionine permease	integral component of membrane GO:0016021, L-methionine transmembrane transporter activity GO:0015191, transport GO:0006810, methionine import GO:0044690, amino acid transmembrane transporter activity GO:0015171, integral component of plasma membrane GO:0005887, fungal-type vacuole GO:0000324, amino acid transmembrane transport GO:0003333, amino acid transport GO:0006865, membrane GO:0016020, ant…
RNR4	305.379	1897.76	6.21443	up	Ribonucleotide-diphosphate reductase (RNR) small subunit	ribonucleoside-diphosphate reductase activity, thioredoxin disulfide as acceptor GO:0004748; nucleus GO:0005634; cytoplasm GO:0005737; ribonucleoside-diphosphate reductase complex GO:0005971; cofactor biosynthetic process GO:0051188; DNA replication GO:0006260; deoxyribonucleotide biosynthetic process GO:0009263; oxidation-reduction process GO:0055114; oxidoreductase activity GO:0016491
AAD4	11.685	70.785	6.05777	up	Putative aryl-alcohol dehydrogenase	oxidoreductase activity GO:0016491, cellular_component GO:0005575, oxidation-reduction process GO:0055114, cellular aldehyde metabolic process GO:0006081, aryl-alcohol dehydrogenase (NAD+) activity GO:0018456
NCE103	183.009	1095.2	5.98442	up	Carbonic anhydrase	carbonate dehydratase activity GO:0004089, cellular response to carbon dioxide GO:0071244, nucleus GO:0005634, carbon utilization GO:0015976, metal ion binding GO:0046872, cytoplasm GO:0005737, zinc ion binding GO:0008270, mitochondrial intermembrane space GO:0005758, cellular response to oxidative stress GO:0034599, lyase activity GO:0016829, mitochondrion GO:0005739
DDI1	37.016	220.268	5.95062	up	DNA damage-inducible v-SNARE binding protein	cytoplasm GO:0005737, proteolysis GO:0006508, aspartic-type endopeptidase activity GO:0004190, ubiquitin binding GO:0043130, protein transport GO:0015031, membrane GO:0016020, transport GO:0006810, ubiquitin-dependent protein catabolic process GO:0006511, vesicle-mediated transport GO:0016192, protein secretion GO:0009306, plasma membrane GO:0005886, SNARE binding GO:0000149
GTT2	17.296	101.411	5.86326	up	Glutathione S-transferase capable of homodimerization	mitochondrion GO:0005739, glutathione transferase activity GO:0004364, transferase activity GO:0016740, glutathione metabolic process GO:0006749
CCC2	15.387	84.883	5.51654	up	Cu(+2)-transporting P-type ATPase	integral component of plasma membrane GO:0005887, cation-transporting ATPase activity GO:0019829, cation transport GO:0006812, ATP binding GO:0005524, nucleotide binding GO:0000166, Golgi apparatus GO:0005794, metal ion transport GO:0030001, copper-transporting ATPase activity GO:0043682, ATP hydrolysis coupled cation transmembrane transport GO:0099132, transmembrane transport GO:0055085, metal i…
CIS1	11.819	64.36	5.44547	up	Protein of unknown function found in mitochondria	mitochondrion GO:0005739, biological_process GO:0008150, molecular_function GO:0003674
RNR2	212.71	1133.94	5.33092	up	Ribonucleotide-diphosphate reductase (RNR), small subunit	ribonucleoside-diphosphate reductase activity, thioredoxin disulfide as acceptor GO:0004748; deoxyribonucleotide biosynthetic process GO:0009263; DNA replication GO:0006260; oxidoreductase activity GO:0016491; oxidation-reduction process GO:0055114; nucleus GO:0005634; ribonucleoside-diphosphate reductase complex GO:0005971; cytoplasm GO:0005737; metal ion binding GO:0046872
YNR064C	1.856	9.369	5.04795	up	Epoxide hydrolase	response to toxic substance GO:0009636, carboxylic ester hydrolase activity GO:0052689, epoxide hydrolase activity GO:0004301, hydrolase activity GO:0016787, cellular_component GO:0005575
MET14	35.262	177.022	5.02019	up	Adenylylsulfate kinase	nucleotide binding GO:0000166; cysteine biosynthetic process GO:0019344; sulfur amino acid metabolic process GO:0000096; sulfate assimilation, phosphoadenylyl sulfate reduction by phosphoadenylyl-sulfate reductase (thioredoxin) GO:0019379; adenylylsulfate kinase activity GO:0004020; kinase activity GO:0016301; ATP binding GO:0005524; hydrogen sulfide biosynthetic process GO:0070814; cellular amin…
MET2	5.359	26.821	5.00485	up	L-homoserine-O-acetyltransferase	cytoplasm GO:0005737; transferase activity GO:0016740; cellular amino acid biosynthetic process GO:0008652; methionine biosynthetic process GO:0009086; transferase activity, transferring acyl groups GO:0016746; homoserine O-acetyltransferase activity GO:0004414; sulfur amino acid metabolic process GO:0000096; homoserine metabolic process GO:0009092
FMP23	20.483	102.297	4.99424	up	Putative protein of unknown function	mitochondrion GO:0005739, biological_process GO:0008150, molecular_function GO:0003674
YCT1	11.555	57.484	4.97482	up	High-affinity cysteine-specific transporter	ion transmembrane transport GO:0034220, integral component of membrane GO:0016021, transport GO:0006810, membrane GO:0016020, transmembrane transport GO:0055085, cell periphery GO:0071944, cysteine transmembrane transport GO:1903712, ion transmembrane transporter activity GO:0015075, cysteine transmembrane transporter activity GO:0033229, cysteine transport GO:0042883, endoplasmic reticulum GO:00…
SDS24	24.142	118.849	4.92291	up	Protein involved in cell separation during budding	regulation of mitotic metaphase/anaphase transition GO:0030071, cellular response to glucose starvation GO:0042149, molecular_function GO:0003674, endocytosis GO:0006897, cytoplasm GO:0005737, cell separation after cytokinesis GO:0000920, cytosol GO:0005829
PLM2	4.094	19.92	4.86566	up	Putative transcription factor, contains Forkhead Associated domain	nucleus GO:0005634, nuclear chromatin GO:0000790, chromatin binding GO:0003682, cellular response to DNA damage stimulus GO:0006974
MPC3	7.575	35.918	4.74165	up	Highly conserved subunit of the mitochondrial pyruvate carrier (MPC)	mitochondrial pyruvate transport GO:0006850, mitochondrion GO:0005739, pyruvate transmembrane transporter activity GO:0050833, mitochondrial pyruvate transmembrane transport GO:1902361, integral component of membrane GO:0016021, mitochondrial inner membrane GO:0005743, membrane GO:0016020, integral component of mitochondrial inner membrane GO:0031305, mitochondrial membrane GO:0031966, transport …
RAD51	35.941	166.87	4.64289	up	Strand exchange protein	DNA-dependent ATPase activity GO:0008094, DNA recombinase assembly GO:0000730, meiotic joint molecule formation GO:0000709, recombinase activity GO:0000150, nuclear chromosome GO:0000228, telomere maintenance via recombination GO:0000722, double-strand break repair via single-strand annealing GO:0045002, strand invasion GO:0042148, condensed nuclear chromosome GO:0000794, cellular response to DNA…
YPS1	35.535	164.754	4.63639	up	Aspartic protease	protein processing GO:0016485, signal transduction involved in filamentous growth GO:0001402, aspartic-type endopeptidase activity GO:0004190, plasma membrane GO:0005886, proteolysis GO:0006508, fungal-type cell wall organization GO:0031505, anchored component of membrane GO:0031225, peptide mating pheromone maturation involved in conjugation with cellular fusion GO:0071432, peptidase activity GO…
PYC1	41.238	190.296	4.61458	up	Pyruvate carboxylase isoform	nucleotide binding GO:0000166, cytoplasm GO:0005737, gluconeogenesis GO:0006094, ATP binding GO:0005524, pyruvate carboxylase activity GO:0004736, biotin binding GO:0009374, pyruvate metabolic process GO:0006090, DNA binding GO:0003677, biotin carboxylase activity GO:0004075, metal ion binding GO:0046872, catalytic activity GO:0003824, cytosol GO:0005829, ligase activity GO:0016874, metabolic pro…
YGR161W-C	39.518	177.219	4.48451	up	Putative protein of unknown function	biological_process GO:0008150, cellular_component GO:0005575, molecular_function GO:0003674
YLR108C	38.872	173.45	4.46208	up	Protein of unknown function	nucleus GO:0005634, biological_process GO:0008150, molecular_function GO:0003674
RFA1	27.111	120.644	4.45	up	Subunit of heterotrimeric Replication Protein A (RPA)	single-stranded DNA binding GO:0003697; sequence-specific DNA binding GO:0043565; DNA replication GO:0006260; DNA unwinding involved in DNA replication GO:0006268; establishment of protein localization GO:0045184; reciprocal meiotic recombination GO:0007131; mitotic recombination GO:0006312; nucleotide-excision repair GO:0006289; telomere maintenance via telomerase GO:0007004; DNA replication fac…
CIN5	19.618	86.592	4.41391	up	Basic leucine zipper (bZIP) transcription factor of the yAP-1 family	response to drug GO:0042493; hyperosmotic response GO:0006972; repressing transcription factor binding GO:0070491; sequence-specific DNA binding GO:0043565; regulation of transcription from RNA polymerase II promoter GO:0006357; cytoplasm GO:0005737; DNA binding GO:0003677; nucleus GO:0005634; regulation of transcription, DNA-templated GO:0006355; transcription factor activity, sequence-specific …
MDJ1	57.143	248.465	4.34813	up	Co-chaperone that stimulates HSP70 protein Ssc1p ATPase activity	mitochondrion GO:0005739, unfolded protein binding GO:0051082, response to heat GO:0009408, ATP binding GO:0005524, mitochondrial matrix GO:0005759, extrinsic component of mitochondrial inner membrane GO:0031314, mitochondrial genome maintenance GO:0000002, misfolded or incompletely synthesized protein catabolic process GO:0006515, 'de novo' protein folding GO:0006458, protein refolding GO:004202…
YKL107W	3.051	13.025	4.26909	up	Putative short-chain dehydrogenase/reductase	molecular_function GO:0003674, oxidoreductase activity GO:0016491, membrane GO:0016020, cellular_component GO:0005575, biological_process GO:0008150, oxidation-reduction process GO:0055114, integral component of membrane GO:0016021
YCR102C	3.005	12.725	4.23461	up	Putative protein of unknown function	response to copper ion GO:0046688, oxidation-reduction process GO:0055114, molecular_function GO:0003674, cellular_component GO:0005575, oxidoreductase activity GO:0016491
MXR1	75.347	318.866	4.23197	up	Methionine-S-sulfoxide reductase	cellular response to oxidative stress GO:0034599, peptide-methionine (S)-S-oxide reductase activity GO:0008113, cytoplasm GO:0005737, oxidation-reduction process GO:0055114, oxidoreductase activity GO:0016491, nucleus GO:0005634
MRS4	34.772	144.189	4.1467	up	Iron transporter of the mitochondrial carrier family	mitochondrial iron ion transport GO:0048250, iron ion transmembrane transporter activity GO:0005381, mitochondrion GO:0005739, mitochondrial inner membrane GO:0005743, ferrous iron transport GO:0015684, membrane GO:0016020, iron ion transmembrane transport GO:0034755, mRNA processing GO:0006397, ferrous iron transmembrane transport GO:1903874, integral component of membrane GO:0016021, transport …
ATG16	3.968	16.442	4.14365	up	Conserved protein involved in autophagy	Atg12-Atg5-Atg16 complex GO:0034274; autophagosome assembly GO:0000045; cytosol GO:0005829; macroautophagy GO:0016236; pre-autophagosomal structure GO:0000407; Atg8 ligase activity GO:0019776; protein binding, bridging GO:0030674; piecemeal microautophagy of nucleus GO:0034727; membrane GO:0016020; nucleus GO:0005634; cytoplasm GO:0005737; CVT pathway GO:0032258; mitophagy GO:0000422; C-terminal …
STR3	3.008	12.295	4.08743	up	Peroxisomal cystathionine beta-lyase	catalytic activity GO:0003824, cystathionine beta-lyase activity GO:0004121, pyridoxal phosphate binding GO:0030170, cysteine biosynthetic process via cystathionine GO:0019343, 'de novo' L-methionine biosynthetic process GO:0071266, cytoplasm GO:0005737, transsulfuration GO:0019346, peroxisome GO:0005777, nucleus GO:0005634, methionine biosynthetic process GO:0009086, lyase activity GO:0016829, c…
CUR1	20.514	83.519	4.07132	up	Sorting factor, central regulator of spatial protein quality control	cellular response to heat GO:0034605; protein localization to nucleus GO:0034504; regulation of transcription, DNA-templated GO:0006355; nucleus GO:0005634; transcription, DNA-templated GO:0006351; protein folding GO:0006457; intracellular protein transport GO:0006886; chaperone binding GO:0051087
SMA1	1.021	4.122	4.03722	up	Protein of unknown function involved in prospore membrane assembly	sporulation resulting in formation of a cellular spore GO:0030435, ascospore-type prospore membrane assembly GO:0032120, prospore membrane GO:0005628, molecular_function GO:0003674
ART10	14.916	59.873	4.01401	up	Protein of unknown function that contains 2 PY motifs	biological_process GO:0008150, molecular_function GO:0003674, cytoplasm GO:0005737, endocytosis GO:0006897
tRNA Genes (4)
tL[CAA]G1	16.789	1.021	16.4437	down	Leucine tRNA (tRNA-Leu), predicted by tRNAscan-SE analysis
tR[ACG]J	13.522	1.021	13.2439	down	Arginine tRNA (tRNA-Arg), predicted by tRNAscan-SE analysis
tD[GUC]J2	6.709	1.021	6.57101	down	Aspartate tRNA (tRNA-Asp), predicted by tRNAscan-SE analysis
tV[AAC]E1	5.409	1.021	5.29775	down	Valine tRNA (tRNA-Val), predicted by tRNAscan-SE analysis
ESR Genes (36)
TMA10	12.723	402.079	31.6025	up	Protein of unknown function that associates with ribosomes	mitochondrion GO:0005739, cytoplasm GO:0005737, ribosome GO:0005840, molecular_function GO:0003674, biological_process GO:0008150, nucleus GO:0005634
HSP42	53.087	729.372	13.7392	up	Small heat shock protein (sHSP) with chaperone activity	cytoplasm GO:0005737, cytoskeleton organization GO:0007010, cytoskeleton GO:0005856, chaperonin-containing T-complex GO:0005832, unfolded protein binding GO:0051082
YJL144W	8.605	109.472	12.7219	up	Cytoplasmic hydrophilin essential in desiccation-rehydration process	cellular response to water deprivation GO:0042631, cytoplasm GO:0005737, molecular_function GO:0003674
ARO10	28.485	265.715	9.32824	up	Phenylpyruvate decarboxylase	phenylpyruvate decarboxylase activity GO:0050177, cytoplasm GO:0005737, tyrosine catabolic process GO:0006572, pyruvate metabolic process GO:0006090, cytosol GO:0005829, pyruvate decarboxylase activity GO:0004737, branched-chain-2-oxoacid decarboxylase activity GO:0047433, ethanol metabolic process GO:0006067, branched-chain amino acid catabolic process GO:0009083, lyase activity GO:0016829, meta…
YBR056W-A	15.547	124.336	7.99743	up	Protein of unknown function	cellular_component GO:0005575, molecular_function GO:0003674, biological_process GO:0008150
ECM4	48.06	358.205	7.45329	up	S-glutathionyl-(chloro)hydroquinone reductase (GS-HQR)	glutathione transferase activity GO:0004364, glutathione dehydrogenase (ascorbate) activity GO:0045174, cell wall organization GO:0071555, cellular oxidant detoxification GO:0098869, glutathione metabolic process GO:0006749, oxidoreductase activity GO:0016491, cytoplasm GO:0005737, oxidation-reduction process GO:0055114, transferase activity GO:0016740
YNL194C	7.378	53.724	7.28165	up	Integral membrane protein	cell periphery GO:0071944, integral component of membrane GO:0016021, endocytosis GO:0006897, plasma membrane GO:0005886, fungal-type cell wall organization GO:0031505, membrane raft GO:0045121, cell cortex GO:0005938, molecular_function GO:0003674, cytoplasm GO:0005737, endoplasmic reticulum GO:0005783, ascospore formation GO:0030437, septin cytoskeleton organization GO:0032185, cortical actin c…
YNL134C	100.58	723.859	7.19685	up	NADH-dependent aldehyde reductase, involved in detoxification of furf	response to furfural GO:1901426, aldehyde dehydrogenase (NAD) activity GO:0004029, oxidation-reduction process GO:0055114, nucleus GO:0005634, oxidoreductase activity GO:0016491, cytoplasm GO:0005737
HSP78	28.909	187.948	6.50137	up	Oligomeric mitochondrial matrix chaperone	mitochondrion GO:0005739, mitochondrial matrix GO:0005759, protein stabilization GO:0050821, cellular response to heat GO:0034605, ATP binding GO:0005524, ATPase activity GO:0016887, misfolded protein binding GO:0051787, protein refolding GO:0042026, protein unfolding GO:0043335, mitochondrial genome maintenance GO:0000002, nucleotide binding GO:0000166
ARO9	42.181	272.789	6.46711	up	Aromatic aminotransferase II	catalytic activity GO:0003824, biosynthetic process GO:0009058, kynurenine-oxoglutarate transaminase activity GO:0016212, L-methionine salvage from methylthioadenosine GO:0019509, L-phenylalanine:2-oxoglutarate aminotransferase activity GO:0080130, L-kynurenine catabolic process GO:0097053, cytoplasm GO:0005737, pyridoxal phosphate binding GO:0030170, transaminase activity GO:0008483, nucleus GO:…
PRB1	87.839	566.602	6.45046	up	Vacuolar proteinase B (yscB) with H3 N-terminal endopeptidase activity	serine-type peptidase activity GO:0008236, serine-type endopeptidase activity GO:0004252, hydrolase activity GO:0016787, protein catabolic process in the vacuole GO:0007039, proteolysis GO:0006508, peptidase activity GO:0008233, vacuole GO:0005773, fungal-type vacuole lumen GO:0000328, cellular response to starvation GO:0009267, sporulation resulting in formation of a cellular spore GO:0030435, f…
YLR149C	6.733	43.409	6.4472	up	Protein of unknown function	molecular_function GO:0003674, cellular_component GO:0005575, biological_process GO:0008150
GRE2	117.235	753.294	6.4255	up	3-methylbutanal reductase and NADPH-dependent methylglyoxal reductase	cytoplasm GO:0005737; nucleus GO:0005634; oxidation-reduction process GO:0055114; oxidoreductase activity, acting on the CH-OH group of donors, NAD or NADP as acceptor GO:0016616; steroid biosynthetic process GO:0006694; 3-beta-hydroxy-delta5-steroid dehydrogenase activity GO:0003854; ergosterol metabolic process GO:0008204; methylglyoxal reductase (NADPH-dependent) activity GO:0043892; oxidoredu…
YML131W	47.534	291.405	6.13045	up	Protein of unknown function	membrane GO:0016020, oxidoreductase activity GO:0016491, integral component of membrane GO:0016021, molecular_function GO:0003674, biological_process GO:0008150, oxidation-reduction process GO:0055114, cytoplasm GO:0005737, cytosol GO:0005829
YHR138C	135.54	828.028	6.1091	up	Protein of unknown function	endopeptidase inhibitor activity GO:0004866; vacuole fusion, non-autophagic GO:0042144; fungal-type vacuole GO:0000324; negative regulation of endopeptidase activity GO:0010951; cellular_component GO:0005575
PRX1	110.243	673.363	6.10799	up	Mitochondrial peroxiredoxin with thioredoxin peroxidase activity	antioxidant activity GO:0016209, cellular response to oxidative stress GO:0034599, mitochondrion GO:0005739, oxidoreductase activity GO:0016491, cellular oxidant detoxification GO:0098869, cell redox homeostasis GO:0045454, peroxiredoxin activity GO:0051920, response to cadmium ion GO:0046686, thioredoxin peroxidase activity GO:0008379, oxidation-reduction process GO:0055114, peroxidase activity …
TSA2	43.926	241.534	5.49866	up	Stress inducible cytoplasmic thioredoxin peroxidase	cytoplasm GO:0005737, cellular response to oxidative stress GO:0034599, oxidation-reduction process GO:0055114, peroxiredoxin activity GO:0051920, oxidoreductase activity GO:0016491, cell redox homeostasis GO:0045454, cellular oxidant detoxification GO:0098869, antioxidant activity GO:0016209, peroxidase activity GO:0004601, protein folding GO:0006457, thioredoxin peroxidase activity GO:0008379
GLC3	7.91	43.19	5.46018	up	Glycogen branching enzyme, involved in glycogen accumulation	cation binding GO:0043169; transferase activity, transferring glycosyl groups GO:0016757; catalytic activity GO:0003824; cytoplasm GO:0005737; 1,4-alpha-glucan branching enzyme activity GO:0003844; glycogen biosynthetic process GO:0005978; transferase activity GO:0016740; hydrolase activity, hydrolyzing O-glycosyl compounds GO:0004553; carbohydrate metabolic process GO:0005975
YKR011C	25.853	139.685	5.40305	up	Protein of unknown function	molecular_function GO:0003674, biological_process GO:0008150, nucleus GO:0005634
HSP104	132.801	715.989	5.39144	up	Disaggregase	trehalose metabolism in response to heat stress GO:0070414; nuclear periphery GO:0034399; ATPase activity, coupled GO:0042623; ATP binding GO:0005524; ADP binding GO:0043531; stress granule disassembly GO:0035617; unfolded protein binding GO:0051082; TRC complex GO:0072380; nucleus GO:0005634; cellular heat acclimation GO:0070370; cytoplasm GO:0005737; chaperone cofactor-dependent protein refoldi…
ATG8	46.669	245.175	5.25349	up	Component of autophagosomes and Cvt vesicles	autophagosome membrane GO:0000421, autophagosome GO:0005776, transport GO:0006810, autophagy GO:0006914, fungal-type vacuole membrane GO:0000329, cellular protein complex localization GO:0034629, protein targeting to vacuole involved in autophagy GO:0071211, protein tag GO:0031386, mitophagy GO:0000422, vacuole GO:0005773, Cvt vesicle membrane GO:0033110, vacuolar membrane GO:0005774, piecemeal m…
SSA4	99.806	507.987	5.08974	up	Heat shock protein that is highly induced upon stress	nucleus GO:0005634; SRP-dependent cotranslational protein targeting to membrane, translocation GO:0006616; cytoplasm GO:0005737; unfolded protein binding GO:0051082; ATPase activity GO:0016887; ATP binding GO:0005524; cellular response to heat GO:0034605; nucleotide binding GO:0000166; protein folding GO:0006457
RTS3	38.32	193.634	5.05308	up	Putative component of the protein phosphatase type 2A complex	biological_process GO:0008150, molecular_function GO:0003674, nucleus GO:0005634, cytoplasm GO:0005737
BDH2	49.651	249.194	5.01891	up	Putative medium-chain alcohol dehydrogenase with similarity to BDH1	nucleus GO:0005634; diacetyl reductase ((R)-acetoin forming) activity GO:0052587; biological_process GO:0008150; oxidoreductase activity GO:0016491; oxidoreductase activity, acting on the CH-OH group of donors, NAD or NADP as acceptor GO:0016616; cytoplasm GO:0005737; oxidation-reduction process GO:0055114; metal ion binding GO:0046872; zinc ion binding GO:0008270
AIM17	24.884	118.56	4.76451	up	Protein of unknown function	oxidoreductase activity GO:0016491, oxidation-reduction process GO:0055114, dioxygenase activity GO:0051213, mitochondrion GO:0005739, molecular_function GO:0003674, mitochondrion organization GO:0007005, metal ion binding GO:0046872
MAG1	22.908	109.131	4.76388	up	3-methyl-adenine DNA glycosylase	nucleus GO:0005634; hydrolase activity GO:0016787; alkylated DNA binding GO:0032131; DNA-7-methylguanine glycosylase activity GO:0043916; DNA-7-methyladenine glycosylase activity GO:0052821; DNA-3-methylguanine glycosylase activity GO:0052822; alkylbase DNA N-glycosylase activity GO:0003905; DNA-3-methyladenine glycosylase activity GO:0008725; damaged DNA binding GO:0003684; base-excision repair,…
RCN2	33.761	149.432	4.42617	up	Protein of unknown function	cytoplasm GO:0005737, biological_process GO:0008150, molecular_function GO:0003674
BOP2	3.563	15.468	4.34129	up	Protein of unknown function	biological_process GO:0008150, molecular_function GO:0003674, cellular_component GO:0005575
XBP1	30.425	131.706	4.32887	up	Transcriptional repressor	nucleus GO:0005634; cytoplasm GO:0005737; sequence-specific DNA binding GO:0043565; negative regulation of transcription from RNA polymerase II promoter GO:0000122; transcriptional activator activity, RNA polymerase II core promoter proximal region sequence-specific binding GO:0001077; RNA polymerase II transcription factor activity, sequence-specific DNA binding GO:0000981; positive regulation o…
GGA1	9.414	39.649	4.21171	up	Golgi-localized protein with homology to gamma-adaptin	Golgi apparatus GO:0005794, transport GO:0006810, cytosol GO:0005829, ubiquitin binding GO:0043130, Golgi to vacuole transport GO:0006896, Golgi to endosome transport GO:0006895, protein targeting to vacuole involved in ubiquitin-dependent protein catabolic process via the multivesicular body sorting pathway GO:0043328, clathrin adaptor complex GO:0030131, intracellular GO:0005622, trans-Golgi ne…
USV1	10.535	44.332	4.20807	up	Putative transcription factor containing a C2H2 zinc finger	nucleus GO:0005634; regulation of transcription from RNA polymerase II promoter in response to salt stress GO:0061416; transcription, DNA-templated GO:0006351; DNA binding GO:0003677; metal ion binding GO:0046872; regulation of transcription, DNA-templated GO:0006355; nucleic acid binding GO:0003676; sequence-specific DNA binding GO:0043565; carbon catabolite activation of transcription from RNA …
ATG1	8.098	33.944	4.19165	up	Protein serine/threonine kinase	protein serine/threonine kinase activity GO:0004674, autophagy GO:0006914, autophagosome membrane GO:0000421, protein kinase activity GO:0004672, pre-autophagosomal structure GO:0000407, protein phosphorylation GO:0006468, late nucleophagy GO:0044805, ATG1/ULK1 kinase complex GO:1990316, cytosol GO:0005829, ATP binding GO:0005524, cytoplasm GO:0005737, transport GO:0006810, phosphorylation GO:001…
PUT1	5.024	21.034	4.1867	up	Proline oxidase	mitochondrion GO:0005739, oxidoreductase activity GO:0016491, proline dehydrogenase activity GO:0004657, oxidation-reduction process GO:0055114, proline metabolic process GO:0006560, proline catabolic process to glutamate GO:0010133, FAD binding GO:0071949, glutamate biosynthetic process GO:0006537, mitochondrial matrix GO:0005759, proline catabolic process GO:0006562
SUE1	9.435	38.691	4.10079	up	Protein required for degradation of unstable forms of cytochrome c	mitochondrial envelope GO:0005740, mitochondrion GO:0005739, molecular_function GO:0003674, protein catabolic process GO:0030163
IKS1	11.772	47.218	4.01104	up	Protein kinase of unknown cellular role	ATP binding GO:0005524, protein serine/threonine kinase activity GO:0004674, kinase activity GO:0016301, phosphorylation GO:0016310, transferase activity GO:0016740, protein kinase activity GO:0004672, protein phosphorylation GO:0006468, cellular_component GO:0005575, nucleotide binding GO:0000166
UBC8	30.51	122.247	4.00678	up	Ubiquitin-conjugating enzyme that regulates gluconeogenesis	negative regulation of gluconeogenesis GO:0045721, ATP binding GO:0005524, nucleotide binding GO:0000166, ubiquitin-protein transferase activity GO:0004842, protein ubiquitination involved in ubiquitin-dependent protein catabolic process GO:0042787, cytoplasm GO:0005737, transferase activity GO:0016740, proteasome-mediated ubiquitin-dependent protein catabolic process GO:0043161, protein ubiquiti…

## Sheet: T30
102 genes at 4-fold change and 95% confidence
Name	Control_Time30_rep - linear total RPKM	Laser_Time30_rep - linear total RPKM	Fold change		DB_Object_Name	GO ID
Up-Regulated Non-ESR Genes (50)
LSO1	2.678	200.282	74.7879	up	Protein with a potential role in response to iron deprivation	iron ion homeostasis GO:0055072, nucleus GO:0005634, molecular_function GO:0003674
HUG1	14.477	529.444	36.5714	up	Ribonucleotide reductase inhibitor	cytoplasm GO:0005737, cellular response to DNA damage stimulus GO:0006974, cell cycle arrest GO:0007050, nucleus GO:0005634, ribonucleoside-diphosphate reductase inhibitor activity GO:1990846, DNA repair GO:0006281, regulation of ribonucleoside-diphosphate reductase activity GO:1905117, negative regulation of catalytic activity GO:0043086, DNA damage checkpoint GO:0000077
RNR3	3.229	44.657	13.83	up	Minor isoform of large subunit of ribonucleotide-diphosphate reductase	mitochondrion GO:0005739; DNA replication GO:0006260; ribonucleoside-diphosphate reductase activity, thioredoxin disulfide as acceptor GO:0004748; cytoplasm GO:0005737; metabolic process GO:0008152; nucleotide binding GO:0000166; ATP binding GO:0005524; oxidation-reduction process GO:0055114; deoxyribonucleotide biosynthetic process GO:0009263; catalytic activity GO:0003824; oxidoreductase activi…
YJL133C-A	46.396	618.022	13.3206	up	Putative protein of unknown function	molecular_function GO:0003674, mitochondrion GO:0005739, integral component of membrane GO:0016021, mitochondrial outer membrane GO:0005741, biological_process GO:0008150, membrane GO:0016020
HMX1	13.964	161.008	11.5302	up	ER localized heme oxygenase	heme oxygenase (decyclizing) activity GO:0004392, heme oxidation GO:0006788, oxidation-reduction process GO:0055114, heme catabolic process GO:0042167, endoplasmic reticulum GO:0005783, membrane GO:0016020, cellular iron ion homeostasis GO:0006879, endoplasmic reticulum membrane GO:0005789, metal ion binding GO:0046872, heme binding GO:0020037, response to oxidative stress GO:0006979, nuclear out…
FIT2	57.626	626.523	10.8722	up	Mannoprotein that is incorporated into the cell wall	ion transport GO:0006811, membrane GO:0016020, transport GO:0006810, fungal-type cell wall GO:0009277, molecular_function GO:0003674, cell wall GO:0005618, siderophore transport GO:0015891, iron ion homeostasis GO:0055072, fungal-type vacuole GO:0000324, cell periphery GO:0071944, extracellular region GO:0005576, anchored component of membrane GO:0031225
SPS100	2.524	26.888	10.6529	up	Protein required for spore wall maturation	asparagine catabolic process GO:0006530; sporulation resulting in formation of a cellular spore GO:0030435; asparaginase activity GO:0004067; cellular amino acid metabolic process GO:0006520; transcription factor activity, sequence-specific DNA binding GO:0003700; sequence-specific DNA binding GO:0043565; nucleus GO:0005634; positive regulation of transcription from RNA polymerase II promoter GO:…
TIS11	7.846	75.067	9.56755	up	mRNA-binding protein expressed during iron starvation	mRNA 3'-UTR binding GO:0003730, nucleus GO:0005634, RNA binding GO:0003723, metal ion binding GO:0046872, cytoplasm GO:0005737, 3'-UTR-mediated mRNA destabilization GO:0061158, cytosol GO:0005829, P-body GO:0000932, mRNA binding GO:0003729, cellular iron ion homeostasis GO:0006879, nuclear-transcribed mRNA catabolic process GO:0000956
ATG8	17.79	161.524	9.07948	up	Component of autophagosomes and Cvt vesicles	autophagosome membrane GO:0000421, autophagosome GO:0005776, transport GO:0006810, autophagy GO:0006914, fungal-type vacuole membrane GO:0000329, cellular protein complex localization GO:0034629, protein targeting to vacuole involved in autophagy GO:0071211, protein tag GO:0031386, mitophagy GO:0000422, vacuole GO:0005773, Cvt vesicle membrane GO:0033110, vacuolar membrane GO:0005774, piecemeal m…
IMT4	1.021	8.348	8.1763	up	Methionine initiator tRNA (tRNA-Met)	eukaryotic 43S preinitiation complex GO:0016282, eukaryotic 48S preinitiation complex GO:0033290, triplet codon-amino acid adaptor activity GO:0030533, cytosol GO:0005829, translational initiation GO:0006413
TFS1	47.336	386.182	8.15832	up	Inhibitor of carboxypeptidase Y (Prc1p), and Ras GAP (Ira2p)	serine-type endopeptidase inhibitor activity GO:0004867, regulation of proteolysis GO:0030162, regulation of Ras protein signal transduction GO:0046578, phospholipid binding GO:0005543, peptidase inhibitor activity GO:0030414, negative regulation of endopeptidase activity GO:0010951, negative regulation of peptidase activity GO:0010466, cytoplasm GO:0005737, fungal-type vacuole membrane GO:000032…
HBN1	2.478	18.52	7.47377	up	Protein of unknown function	nucleus GO:0005634; biological_process GO:0008150; cytoplasm GO:0005737; oxidoreductase activity, acting on NAD(P)H, nitrogenous group as acceptor GO:0016657; oxidation-reduction process GO:0055114; oxidoreductase activity GO:0016491; cellular response to oxidative stress GO:0034599
HSP82	55.469	404.982	7.30105	up	Hsp90 chaperone	cytoplasm GO:0005737; 'de novo' protein folding GO:0006458; protein refolding GO:0042026; unfolded protein binding GO:0051082; proteasome assembly GO:0043248; response to osmotic stress GO:0006970; ATP binding GO:0005524; response to stress GO:0006950; ATPase activity, coupled GO:0042623; protein maturation GO:0051604; positive regulation of telomere maintenance via telomerase GO:0032212; nucleot…
UGX2	4.611	33.053	7.16829	up	Protein of unknown function	cellular_component GO:0005575, molecular_function GO:0003674, biological_process GO:0008150
YBL100W-C	1.021	6.847	6.70617	up	Putative protein of unknown function	biological_process GO:0008150, cellular_component GO:0005575, molecular_function GO:0003674
SPS19	2.971	19.744	6.64557	up	Peroxisomal 2,4-dienoyl-CoA reductase	2,4-dienoyl-CoA reductase (NADPH) activity GO:0008670; sporulation resulting in formation of a cellular spore GO:0030435; peroxisomal matrix GO:0005782; fatty acid catabolic process GO:0009062; ascospore formation GO:0030437; peroxisome GO:0005777; oxidoreductase activity GO:0016491; oxidation-reduction process GO:0055114
STF1	36.143	235.43	6.51385	up	Protein involved in regulation of the mitochondrial F1F0-ATP synthase	ATPase binding GO:0051117, ATPase inhibitor activity GO:0042030, folic acid-containing compound biosynthetic process GO:0009396, tetrahydrofolate interconversion GO:0035999, negative regulation of ATPase activity GO:0032780, mitochondrion GO:0005739, 5-formyltetrahydrofolate cyclo-ligase activity GO:0030272, heme biosynthetic process GO:0006783
YDL124W	136.835	878.858	6.42276	up	NADPH-dependent alpha-keto amide reductase	alpha-keto amide reductase activity GO:0051268, nucleus GO:0005634, cytoplasm GO:0005737, cellular response to oxidative stress GO:0034599, plasma membrane GO:0005886, oxidation-reduction process GO:0055114, oxidoreductase activity GO:0016491, alditol:NADP+ 1-oxidoreductase activity GO:0004032, cellular ketone metabolic process GO:0042180, aldo-keto reductase (NADP) activity GO:0004033, alpha-ket…
DDI1	26.339	166.993	6.34014	up	DNA damage-inducible v-SNARE binding protein	cytoplasm GO:0005737, proteolysis GO:0006508, aspartic-type endopeptidase activity GO:0004190, ubiquitin binding GO:0043130, protein transport GO:0015031, membrane GO:0016020, transport GO:0006810, ubiquitin-dependent protein catabolic process GO:0006511, vesicle-mediated transport GO:0016192, protein secretion GO:0009306, plasma membrane GO:0005886, SNARE binding GO:0000149
PYC1	18.841	116.902	6.20466	up	Pyruvate carboxylase isoform	nucleotide binding GO:0000166, cytoplasm GO:0005737, gluconeogenesis GO:0006094, ATP binding GO:0005524, pyruvate carboxylase activity GO:0004736, biotin binding GO:0009374, pyruvate metabolic process GO:0006090, DNA binding GO:0003677, biotin carboxylase activity GO:0004075, metal ion binding GO:0046872, catalytic activity GO:0003824, cytosol GO:0005829, ligase activity GO:0016874, metabolic pro…
RIM4	1.378	8.292	6.01742	up	Putative RNA-binding protein	premeiotic DNA replication GO:0006279, sporulation resulting in formation of a cellular spore GO:0030435, RNA binding GO:0003723, nucleus GO:0005634, nucleotide binding GO:0000166, nucleic acid binding GO:0003676, meiotic cell cycle GO:0051321, reciprocal meiotic recombination GO:0007131, cytoplasm GO:0005737
YKL071W	5.033	30.271	6.0145	up	Putative protein of unknown function	cytoplasm GO:0005737, integral component of membrane GO:0016021, oxidoreductase activity GO:0016491, biological_process GO:0008150, oxidation-reduction process GO:0055114, molecular_function GO:0003674
SIT1	23.674	138.069	5.83209	up	Ferrioxamine B transporter	siderophore transmembrane transport GO:0044718, fungal-type vacuole GO:0000324, transmembrane transport GO:0055085, plasma membrane GO:0005886, endosome membrane GO:0010008, vacuolar membrane GO:0005774, iron ion homeostasis GO:0055072, ion transport GO:0006811, transport GO:0006810, integral component of membrane GO:0016021, cellular iron ion homeostasis GO:0006879, siderophore transport GO:0015…
SPG1	1.021	5.53	5.41626	up	Protein required for high temperature survival during stationary phase	mitochondrion GO:0005739, biological_process GO:0008150, membrane GO:0016020, molecular_function GO:0003674, endoplasmic reticulum GO:0005783, integral component of membrane GO:0016021, mitochondrial membrane GO:0031966
ENB1	22.518	118.006	5.24052	up	Endosomal ferric enterobactin transporter	fungal-type vacuole GO:0000324, transport GO:0006810, ferric-enterobactin transport GO:0015685, endosome membrane GO:0010008, integral component of membrane GO:0016021, endosome GO:0005768, ion transport GO:0006811, cellular iron ion homeostasis GO:0006879, iron ion homeostasis GO:0055072, transmembrane transport GO:0055085, membrane GO:0016020, vacuolar membrane GO:0005774, cell periphery GO:007…
YBR085C-A	149.251	761.805	5.10419	up	Protein of unknown function	cytoplasm GO:0005737, nucleus GO:0005634, molecular_function GO:0003674, biological_process GO:0008150
MEF2	3.674	18.728	5.09744	up	Mitochondrial elongation factor involved in translational elongation	GTPase activity GO:0003924, ribosome disassembly GO:0032790, cytosol GO:0005829, mitochondrion GO:0005739, GTP binding GO:0005525, nucleotide binding GO:0000166, translational elongation GO:0006414, mitochondrial translation GO:0032543, regulation of mitochondrial membrane potential GO:0051881, translation elongation factor activity GO:0003746, translation GO:0006412, mitochondrial genome mainten…
YKL107W	1.734	8.704	5.01961	up	Putative short-chain dehydrogenase/reductase	molecular_function GO:0003674, oxidoreductase activity GO:0016491, membrane GO:0016020, cellular_component GO:0005575, biological_process GO:0008150, oxidation-reduction process GO:0055114, integral component of membrane GO:0016021
IZH4	8.504	42.502	4.99788	up	Membrane protein involved in zinc ion homeostasis	endoplasmic reticulum GO:0005783, cytoplasm GO:0005737, cellular zinc ion homeostasis GO:0006882, integral component of membrane GO:0016021, molecular_function GO:0003674, endoplasmic reticulum membrane GO:0005789, fungal-type vacuole GO:0000324, nucleus GO:0005634, membrane GO:0016020
DBP1	3.207	16.021	4.99563	up	Putative ATP-dependent RNA helicase of the DEAD-box protein family	cytoplasmic ribonucleoprotein granule GO:0036464, nucleotide binding GO:0000166, hydrolase activity GO:0016787, RNA helicase activity GO:0003724, cytoplasm GO:0005737, translational initiation GO:0006413, mRNA binding GO:0003729, helicase activity GO:0004386, ATP-dependent RNA helicase activity GO:0004004, RNA secondary structure unwinding GO:0010501, translation GO:0006412, ATP binding GO:000552…
CCC2	9.858	48.646	4.93467	up	Cu(+2)-transporting P-type ATPase	integral component of plasma membrane GO:0005887, cation-transporting ATPase activity GO:0019829, cation transport GO:0006812, ATP binding GO:0005524, nucleotide binding GO:0000166, Golgi apparatus GO:0005794, metal ion transport GO:0030001, copper-transporting ATPase activity GO:0043682, ATP hydrolysis coupled cation transmembrane transport GO:0099132, transmembrane transport GO:0055085, metal i…
RNR4	283.863	1368.35	4.82045	up	Ribonucleotide-diphosphate reductase (RNR) small subunit	ribonucleoside-diphosphate reductase activity, thioredoxin disulfide as acceptor GO:0004748; nucleus GO:0005634; cytoplasm GO:0005737; ribonucleoside-diphosphate reductase complex GO:0005971; cofactor biosynthetic process GO:0051188; DNA replication GO:0006260; deoxyribonucleotide biosynthetic process GO:0009263; oxidation-reduction process GO:0055114; oxidoreductase activity GO:0016491
FMP52	97.317	465.773	4.78614	up	Protein of unknown function	mitochondrion GO:0005739, membrane GO:0016020, biological_process GO:0008150, endoplasmic reticulum GO:0005783, mitochondrial outer membrane GO:0005741, molecular_function GO:0003674
FMP23	13.483	63.431	4.70452	up	Putative protein of unknown function	mitochondrion GO:0005739, biological_process GO:0008150, molecular_function GO:0003674
SOR2	5.903	27.501	4.65882	up	Sorbitol dehydrogenase	oxidoreductase activity GO:0016491, oxidation-reduction process GO:0055114, hexose metabolic process GO:0019318, cellular_component GO:0005575, L-iditol 2-dehydrogenase activity GO:0003939, metal ion binding GO:0046872, zinc ion binding GO:0008270
BNA2	3.181	14.806	4.65451	up	Tryptophan 2,3-dioxygenase or indoleamine 2,3-dioxygenase	metal ion binding GO:0046872; oxidation-reduction process GO:0055114; 'de novo' NAD biosynthetic process from tryptophan GO:0034354; tryptophan catabolic process to kynurenine GO:0019441; dioxygenase activity GO:0051213; heme binding GO:0020037; oxidoreductase activity GO:0016491; cytoplasm GO:0005737; indoleamine 2,3-dioxygenase activity GO:0033754; NAD biosynthetic process GO:0009435
UFD1	38.599	178.806	4.6324	up	Substrate-recruiting cofactor of the Cdc48p-Npl4p-Ufd1p segregase	ER-associated misfolded protein catabolic process GO:0071712; proteasome-mediated ubiquitin-dependent protein catabolic process GO:0043161; VCP-NPL4-UFD1 AAA ATPase complex GO:0034098; ubiquitin-dependent catabolism of misfolded proteins by cytoplasm-associated proteasome GO:0071629; Hrd1p ubiquitin ligase ERAD-L complex GO:0000839; Doa10p ubiquitin ligase complex GO:0000837; negative regulation …
YPR015C	3.983	17.969	4.51142	up	Putative zinc finger transcription factor	biological_process GO:0008150, sequence-specific DNA binding GO:0043565, metal ion binding GO:0046872, cellular_component GO:0005575, nucleic acid binding GO:0003676
YPI1	42.838	192.534	4.49447	up	Regulatory subunit of the type I protein phosphatase (PP1) Glc7p	nucleus GO:0005634, glycogen metabolic process GO:0005977, protein phosphatase activator activity GO:0072542, protein phosphatase type 1 complex GO:0000164, mitotic spindle assembly checkpoint GO:0007094, cellular ion homeostasis GO:0006873, protein serine/threonine phosphatase inhibitor activity GO:0004865, negative regulation of protein dephosphorylation GO:0035308, negative regulation of phosp…
COX23	11.769	52.696	4.47753	up	Protein that functions in mitochondrial copper homeostasis	mitochondrion GO:0005739, cytoplasm GO:0005737, molecular_function GO:0003674, mitochondrial respiratory chain complex assembly GO:0033108, mitochondrial intermembrane space GO:0005758
ECM29	9.043	40.3	4.45649	up	Scaffold protein	nucleus GO:0005634, cytoplasm GO:0005737, proteasome assembly GO:0043248, proteasome complex GO:0000502, protein complex scaffold GO:0032947
MPC3	3.647	15.951	4.37373	up	Highly conserved subunit of the mitochondrial pyruvate carrier (MPC)	mitochondrial pyruvate transport GO:0006850, mitochondrion GO:0005739, pyruvate transmembrane transporter activity GO:0050833, mitochondrial pyruvate transmembrane transport GO:1902361, integral component of membrane GO:0016021, mitochondrial inner membrane GO:0005743, membrane GO:0016020, integral component of mitochondrial inner membrane GO:0031305, mitochondrial membrane GO:0031966, transport …
GDH3	6.542	28.447	4.34836	up	NADP(+)-dependent glutamate dehydrogenase	glutamate dehydrogenase (NAD+) activity GO:0004352; glutamate biosynthetic process GO:0006537; glutamate dehydrogenase (NADP+) activity GO:0004354; cytosol GO:0005829; oxidoreductase activity GO:0016491; ammonia assimilation cycle GO:0019676; oxidation-reduction process GO:0055114; mitochondrion GO:0005739; oxidoreductase activity, acting on the CH-NH2 group of donors, NAD or NADP as acceptor GO:…
ARG3	4.386	19.033	4.33949	up	Ornithine carbamoyltransferase	ornithine carbamoyltransferase activity GO:0004585, amino acid binding GO:0016597, carboxyl- or carbamoyltransferase activity GO:0016743, cellular amino acid biosynthetic process GO:0008652, cellular amino acid metabolic process GO:0006520, transferase activity GO:0016740, cytoplasm GO:0005737, arginine biosynthetic process via ornithine GO:0042450, arginine biosynthetic process GO:0006526, mitoc…
YGR053C	3.814	16.468	4.31778	up	Putative protein of unknown function	cellular_component GO:0005575, molecular_function GO:0003674, biological_process GO:0008150
SDH6	23.425	101.086	4.3153	up	Mitochondrial protein involved in assembly of succinate dehydrogenase	mitochondrion GO:0005739, mitochondrial matrix GO:0005759, mitochondrial respiratory chain complex II assembly GO:0034553, molecular_function GO:0003674
YHR140W	5.778	23.857	4.12894	up	Putative integral membrane protein of unknown function	molecular_function GO:0003674, integral component of membrane GO:0016021, biological_process GO:0008150, cytoplasm GO:0005737, endoplasmic reticulum GO:0005783, membrane GO:0016020, endoplasmic reticulum membrane GO:0005789
XYL2	4.201	17.296	4.11711	up	Xylitol dehydrogenase	carbohydrate metabolic process GO:0005975, xylulose biosynthetic process GO:0005999, cellular_component GO:0005575, oxidation-reduction process GO:0055114, metal ion binding GO:0046872, zinc ion binding GO:0008270, D-xylulose reductase activity GO:0046526, oxidoreductase activity GO:0016491, D-xylose metabolic process GO:0042732, L-arabinose catabolic process to xylulose 5-phosphate GO:0019569
RNR2	212.379	862.576	4.06149	up	Ribonucleotide-diphosphate reductase (RNR), small subunit	ribonucleoside-diphosphate reductase activity, thioredoxin disulfide as acceptor GO:0004748; deoxyribonucleotide biosynthetic process GO:0009263; DNA replication GO:0006260; oxidoreductase activity GO:0016491; oxidation-reduction process GO:0055114; nucleus GO:0005634; ribonucleoside-diphosphate reductase complex GO:0005971; cytoplasm GO:0005737; metal ion binding GO:0046872
SPO24	555.816	2250.22	4.04851	up	Small (67 amino acids) protein involved in sporulation	prospore membrane GO:0005628, molecular_function GO:0003674, sporulation resulting in formation of a cellular spore GO:0030435
Down-regulated Non-ESR Genes (1)
HO	63.2	10.926	5.784	down	Site-specific endonuclease	gene conversion at mating-type locus, DNA double-strand break formation GO:0000728; DNA binding GO:0003677; endonuclease activity GO:0004519; protein splicing GO:0030908; hydrolase activity GO:0016787; intein-mediated protein splicing GO:0016539; nucleus GO:0005634; nuclease activity GO:0004518; metal ion binding GO:0046872; mating type switching GO:0007533
tRNA Genes (6)
tX[XXX]D	1.021	4.668	4.57199	up	tRNA of undetermined specificity, predicted by tRNAscan-SE analysis; very similar to serine tRNAs
tN[GUU]L	5.613	1.021	5.49755	down	Asparagine tRNA (tRNA-Asn), predicted by tRNAscan-SE analysis
tR[UCU]M2	5.141	1.021	5.03526	down	Arginine tRNA (tRNA-Arg), predicted by tRNAscan-SE analysis
tN[GUU]N1	5.029	1.021	4.92556	down	Asparagine tRNA (tRNA-Asn), predicted by tRNAscan-SE analysis
tH[GUG]E1	4.287	1.021	4.19882	down	Histidine tRNA (tRNA-His), predicted by tRNAscan-SE analysis
tK[CUU]C	4.242	1.021	4.15475	down	Lysine tRNA (tRNA-Lys), predicted by tRNAscan-SE analysis
ESR Genes (45)
TMA10	9.636	159.438	16.5461	up	Protein of unknown function that associates with ribosomes	mitochondrion GO:0005739, cytoplasm GO:0005737, ribosome GO:0005840, molecular_function GO:0003674, biological_process GO:0008150, nucleus GO:0005634
HSP42	10.307	157.083	15.2404	up	Small heat shock protein (sHSP) with chaperone activity	cytoplasm GO:0005737, cytoskeleton organization GO:0007010, cytoskeleton GO:0005856, chaperonin-containing T-complex GO:0005832, unfolded protein binding GO:0051082
YHR138C	54.487	750.465	13.7733	up	Protein of unknown function	endopeptidase inhibitor activity GO:0004866; vacuole fusion, non-autophagic GO:0042144; fungal-type vacuole GO:0000324; negative regulation of endopeptidase activity GO:0010951; cellular_component GO:0005575
ECM4	14.405	171.841	11.9293	up	S-glutathionyl-(chloro)hydroquinone reductase (GS-HQR)	glutathione transferase activity GO:0004364, glutathione dehydrogenase (ascorbate) activity GO:0045174, cell wall organization GO:0071555, cellular oxidant detoxification GO:0098869, glutathione metabolic process GO:0006749, oxidoreductase activity GO:0016491, cytoplasm GO:0005737, oxidation-reduction process GO:0055114, transferase activity GO:0016740
YNL195C	3.622	37.537	10.3636	up	Protein of unknown function	mitochondrion GO:0005739, molecular_function GO:0003674, biological_process GO:0008150
TSA2	23.072	212.231	9.19864	up	Stress inducible cytoplasmic thioredoxin peroxidase	cytoplasm GO:0005737, cellular response to oxidative stress GO:0034599, oxidation-reduction process GO:0055114, peroxiredoxin activity GO:0051920, oxidoreductase activity GO:0016491, cell redox homeostasis GO:0045454, cellular oxidant detoxification GO:0098869, antioxidant activity GO:0016209, peroxidase activity GO:0004601, protein folding GO:0006457, thioredoxin peroxidase activity GO:0008379
PRB1	38.49	333.652	8.66854	up	Vacuolar proteinase B (yscB) with H3 N-terminal endopeptidase activity	serine-type peptidase activity GO:0008236, serine-type endopeptidase activity GO:0004252, hydrolase activity GO:0016787, protein catabolic process in the vacuole GO:0007039, proteolysis GO:0006508, peptidase activity GO:0008233, vacuole GO:0005773, fungal-type vacuole lumen GO:0000328, cellular response to starvation GO:0009267, sporulation resulting in formation of a cellular spore GO:0030435, f…
UBI4	108.443	891.851	8.22415	up	Ubiquitin	nucleus GO:0005634, cytoplasm GO:0005737, peroxisomal importomer complex GO:1990429, ascospore formation GO:0030437, protein tag GO:0031386, protein polyubiquitination GO:0000209, protein monoubiquitination GO:0006513, protein deubiquitination GO:0016579, ATP-dependent protein binding GO:0043008, protein ubiquitination GO:0016567
GLK1	44.062	361.333	8.20056	up	Glucokinase	glucokinase activity GO:0004340; glucose 6-phosphate metabolic process GO:0051156; glucose metabolic process GO:0006006; mannose metabolic process GO:0006013; glycolytic process GO:0006096; cytosol GO:0005829; glucose import GO:0046323; nucleotide binding GO:0000166; cellular glucose homeostasis GO:0001678; hexokinase activity GO:0004396; glucose binding GO:0005536; phosphotransferase activity, a…
PRX1	41.359	324.588	7.84806	up	Mitochondrial peroxiredoxin with thioredoxin peroxidase activity	antioxidant activity GO:0016209, cellular response to oxidative stress GO:0034599, mitochondrion GO:0005739, oxidoreductase activity GO:0016491, cellular oxidant detoxification GO:0098869, cell redox homeostasis GO:0045454, peroxiredoxin activity GO:0051920, response to cadmium ion GO:0046686, thioredoxin peroxidase activity GO:0008379, oxidation-reduction process GO:0055114, peroxidase activity …
HSP78	8.467	65.218	7.70261	up	Oligomeric mitochondrial matrix chaperone	mitochondrion GO:0005739, mitochondrial matrix GO:0005759, protein stabilization GO:0050821, cellular response to heat GO:0034605, ATP binding GO:0005524, ATPase activity GO:0016887, misfolded protein binding GO:0051787, protein refolding GO:0042026, protein unfolding GO:0043335, mitochondrial genome maintenance GO:0000002, nucleotide binding GO:0000166
HSP26	46.001	348.618	7.57849	up	Small heat shock protein (sHSP) with chaperone activity	cytoplasmic stress granule GO:0010494, mRNA binding GO:0003729, cytoplasm GO:0005737, unfolded protein binding GO:0051082, cellular response to heat GO:0034605, protein folding GO:0006457, mitochondrion GO:0005739, nucleus GO:0005634
GPG1	15.999	121.055	7.56641	up	Proposed gamma subunit of the heterotrimeric G protein	signal transducer activity GO:0004871, cellular_component GO:0005575, signal transduction GO:0007165, cytoplasm GO:0005737, invasive growth in response to glucose limitation GO:0001403
DCS2	7.211	53.036	7.35487	up	m(7)GpppX pyrophosphatase regulator	nuclear-transcribed mRNA catabolic process, nonsense-mediated decay GO:0000184; m7G(5')pppN diphosphatase activity GO:0050072; cytoplasm GO:0005737; cellular response to starvation GO:0009267; hydrolase activity GO:0016787; P-body GO:0000932; catalytic activity GO:0003824; deadenylation-dependent decapping of nuclear-transcribed mRNA GO:0000290; RNA 7-methylguanosine cap binding GO:0000340; nucle…
MAG1	13.193	91.113	6.90616	up	3-methyl-adenine DNA glycosylase	nucleus GO:0005634; hydrolase activity GO:0016787; alkylated DNA binding GO:0032131; DNA-7-methylguanine glycosylase activity GO:0043916; DNA-7-methyladenine glycosylase activity GO:0052821; DNA-3-methylguanine glycosylase activity GO:0052822; alkylbase DNA N-glycosylase activity GO:0003905; DNA-3-methyladenine glycosylase activity GO:0008725; damaged DNA binding GO:0003684; base-excision repair,…
YBR285W	5.664	38.557	6.80738	up	Putative protein of unknown function	molecular_function GO:0003674, biological_process GO:0008150, cellular_component GO:0005575
STF2	74.545	450.198	6.03928	up	Protein involved in resistance to desiccation stress	cellular response to desiccation GO:0071465, cytoplasm GO:0005737, molecular_function GO:0003674, mitochondrion GO:0005739
SSA4	25.901	154.497	5.9649	up	Heat shock protein that is highly induced upon stress	nucleus GO:0005634; SRP-dependent cotranslational protein targeting to membrane, translocation GO:0006616; cytoplasm GO:0005737; unfolded protein binding GO:0051082; ATPase activity GO:0016887; ATP binding GO:0005524; cellular response to heat GO:0034605; nucleotide binding GO:0000166; protein folding GO:0006457
HXT5	3.415	19.464	5.69956	up	Hexose transporter with moderate affinity for glucose	mannose transmembrane transporter activity GO:0015578, integral component of membrane GO:0016021, hexose transport GO:0008645, glucose transmembrane transporter activity GO:0005355, plasma membrane GO:0005886, fructose transmembrane transporter activity GO:0005353, cell periphery GO:0071944, substrate-specific transmembrane transporter activity GO:0022891, transmembrane transport GO:0055085, inte…
GOR1	8.005	44.881	5.60662	up	Glyoxylate reductase	oxidation-reduction process GO:0055114; oxidoreductase activity, acting on the CH-OH group of donors, NAD or NADP as acceptor GO:0016616; NAD binding GO:0051287; mitochondrion GO:0005739; cytosol GO:0005829; glyoxylate reductase activity GO:0047964; metabolic process GO:0008152; oxidoreductase activity GO:0016491; nucleus GO:0005634; glyoxylate reductase (NADP) activity GO:0030267; cytoplasm GO:0…
NQM1	24.315	135.579	5.57594	up	Transaldolase of unknown function	sedoheptulose-7-phosphate:D-glyceraldehyde-3-phosphate glyceronetransferase activity GO:0004801, nucleus GO:0005634, chronological cell aging GO:0001300, catalytic activity GO:0003824, cytoplasm GO:0005737, cellular response to oxidative stress GO:0034599, pentose-phosphate shunt GO:0006098, transferase activity GO:0016740, carbohydrate metabolic process GO:0005975
PAI3	18.392	102.481	5.57204	up	Cytoplasmic proteinase A (Pep4p) inhibitor	vacuole GO:0005773, negative regulation of peptidase activity GO:0010466, aspartic-type endopeptidase inhibitor activity GO:0019828, cytoplasm GO:0005737, nucleus GO:0005634, protein catabolic process in the vacuole GO:0007039, endopeptidase inhibitor activity GO:0004866, negative regulation of endopeptidase activity GO:0010951, peptidase inhibitor activity GO:0030414
GPX1	11.263	62.615	5.55935	up	Phospholipid hydroperoxide glutathione peroxidase	glutathione peroxidase activity GO:0004602, cellular response to oxidative stress GO:0034599, oxidoreductase activity GO:0016491, oxidation-reduction process GO:0055114, response to oxidative stress GO:0006979, cytosol GO:0005829, phospholipid-hydroperoxide glutathione peroxidase activity GO:0047066, peroxisomal matrix GO:0005782, extrinsic component of mitochondrial outer membrane GO:0031315, pe…
YJL163C	2.566	14.135	5.50857	up	Putative protein of unknown function	fungal-type vacuole membrane GO:0000329, integral component of membrane GO:0016021, transmembrane transport GO:0055085, membrane GO:0016020, molecular_function GO:0003674, biological_process GO:0008150
YMR196W	11.959	64.725	5.41224	up	Putative protein of unknown function	cytoplasm GO:0005737, protein N-linked glycosylation GO:0006487, catalytic activity GO:0003824, mannosyl-oligosaccharide glucosidase activity GO:0004573, endoplasmic reticulum membrane GO:0005789, oligosaccharide metabolic process GO:0009311, biological_process GO:0008150, molecular_function GO:0003674
YJL144W	7.393	37.931	5.13066	up	Cytoplasmic hydrophilin essential in desiccation-rehydration process	cellular response to water deprivation GO:0042631, cytoplasm GO:0005737, molecular_function GO:0003674
GAD1	22.384	114.609	5.12013	up	Glutamate decarboxylase	cytoplasm GO:0005737, cellular response to oxidative stress GO:0034599, pyridoxal phosphate binding GO:0030170, glutamate decarboxylase activity GO:0004351, glutamate catabolic process GO:0006538, lyase activity GO:0016829, catalytic activity GO:0003824, glutamate metabolic process GO:0006536, carboxy-lyase activity GO:0016831, carboxylic acid metabolic process GO:0019752
GSP2	53.738	273.919	5.09731	up	GTP binding protein (mammalian Ranp homolog)	GTPase activity GO:0003924, integral component of membrane GO:0016021, nucleus GO:0005634, nucleus organization GO:0006997, signal transduction GO:0007165, small GTPase mediated signal transduction GO:0007264, protein transport GO:0015031, cytoplasm GO:0005737, GTP binding GO:0005525, nucleotide binding GO:0000166, intracellular protein transport GO:0006886, nucleocytoplasmic transport GO:0006913…
YMR090W	36.715	183.596	5.00057	up	Putative protein of unknown function	cytoplasm GO:0005737, molecular_function GO:0003674, biological_process GO:0008150
UBC5	36.373	178.11	4.89676	up	Ubiquitin-conjugating enzyme	nucleotide binding GO:0000166, ubiquitin-protein transferase activity GO:0004842, protein polyubiquitination GO:0000209, transferase activity GO:0016740, proteasome complex GO:0000502, protein ubiquitination GO:0016567, ATP binding GO:0005524, cellular response to heat GO:0034605
YJR096W	37.081	176.672	4.76449	up	Xylose and arabinose reductase	D-xylose catabolic process GO:0042843, arabinose catabolic process GO:0019568, oxidoreductase activity GO:0016491, alditol:NADP+ 1-oxidoreductase activity GO:0004032, cellular response to oxidative stress GO:0034599, oxidation-reduction process GO:0055114, nucleus GO:0005634, aldo-keto reductase (NADP) activity GO:0004033, cytoplasm GO:0005737
YBR056W-A	17.396	82.452	4.73971	up	Protein of unknown function	cellular_component GO:0005575, molecular_function GO:0003674, biological_process GO:0008150
YNL134C	59.105	279.525	4.7293	up	NADH-dependent aldehyde reductase, involved in detoxification of furf	response to furfural GO:1901426, aldehyde dehydrogenase (NAD) activity GO:0004029, oxidation-reduction process GO:0055114, nucleus GO:0005634, oxidoreductase activity GO:0016491, cytoplasm GO:0005737
HSP12	1108.57	5101.69	4.60204	up	Plasma membrane protein involved in maintaining membrane organization	cell adhesion GO:0007155, plasma membrane GO:0005886, plasma membrane organization GO:0007009, lipid binding GO:0008289, endosome GO:0005768, cytosol GO:0005829, cellular response to osmotic stress GO:0071470, cellular response to oxidative stress GO:0034599, cellular response to heat GO:0034605, response to stress GO:0006950, cytoplasm GO:0005737, nucleus GO:0005634
UBC8	17.985	81.87	4.55213	up	Ubiquitin-conjugating enzyme that regulates gluconeogenesis	negative regulation of gluconeogenesis GO:0045721, ATP binding GO:0005524, nucleotide binding GO:0000166, ubiquitin-protein transferase activity GO:0004842, protein ubiquitination involved in ubiquitin-dependent protein catabolic process GO:0042787, cytoplasm GO:0005737, transferase activity GO:0016740, proteasome-mediated ubiquitin-dependent protein catabolic process GO:0043161, protein ubiquiti…
GTT1	110.991	500.896	4.51294	up	ER associated glutathione S-transferase	mitochondrial outer membrane GO:0005741, transferase activity GO:0016740, mitochondrion GO:0005739, glutathione transferase activity GO:0004364, endoplasmic reticulum GO:0005783, cellular oxidant detoxification GO:0098869, translation elongation factor activity GO:0003746, nucleus GO:0005634, endoplasmic reticulum membrane GO:0005789, glutathione peroxidase activity GO:0004602, membrane GO:001602…
UIP4	5.641	25.319	4.48839	up	Protein that interacts with Ulp1p	mitochondrial outer membrane GO:0005741, nuclear envelope GO:0005635, endoplasmic reticulum membrane GO:0005789, endoplasmic reticulum GO:0005783, molecular_function GO:0003674, biological_process GO:0008150, mitochondrion GO:0005739, membrane GO:0016020, nucleus GO:0005634
NNR2	27.631	123.047	4.45322	up	Widely-conserved NADHX dehydratase	cytoplasm GO:0005737, ADP-dependent NAD(P)H-hydrate dehydratase activity GO:0052855, ATP-dependent NAD(P)H-hydrate dehydratase activity GO:0047453, nicotinamide nucleotide metabolic process GO:0046496, nucleotide binding GO:0000166, lyase activity GO:0016829, ATP binding GO:0005524
TMC1	160.724	711.988	4.42988	up	AN1-type zinc finger protein, effector of proteotoxic stress response	metal ion binding GO:0046872, cellular response to arsenic-containing substance GO:0071243, cellular response to misfolded protein GO:0071218, molecular_function GO:0003674, nucleus GO:0005634, zinc ion binding GO:0008270
PNC1	87.033	380.376	4.37048	up	Nicotinamidase that converts nicotinamide to nicotinic acid	negative regulation of DNA amplification GO:1904524; cytoplasm GO:0005737; pyridine nucleotide biosynthetic process GO:0019363; peroxisome GO:0005777; metabolic process GO:0008152; catalytic activity GO:0003824; nucleus GO:0005634; replicative cell aging GO:0001302; chromatin silencing at telomere GO:0006348; chromatin silencing at rDNA GO:0000183; nicotinate nucleotide salvage GO:0019358; nicoti…
APE1	18.097	79.024	4.36669	up	Vacuolar aminopeptidase yscI	transport GO:0006810, protein catabolic process in the vacuole GO:0007039, metalloaminopeptidase activity GO:0070006, metal ion binding GO:0046872, extracellular region GO:0005576, proteolysis GO:0006508, metallopeptidase activity GO:0008237, vacuole GO:0005773, peptidase activity GO:0008233, aminopeptidase activity GO:0004177, hydrolase activity GO:0016787, fungal-type vacuole GO:0000324, protei…
MRP8	89.564	388.686	4.33976	up	Protein of unknown function	biological_process GO:0008150, molecular_function GO:0003674, cytoplasm GO:0005737
RDL1	212.485	907.662	4.27165	up	Thiosulfate sulfurtransferase	mitochondrion GO:0005739, mitochondrial outer membrane GO:0005741, biological_process GO:0008150, endoplasmic reticulum GO:0005783, thiosulfate sulfurtransferase activity GO:0004792, transferase activity GO:0016740
TRX2	1321.02	5514.35	4.17431	up	Cytoplasmic thioredoxin isoenzyme	retrograde vesicle-mediated transport, Golgi to ER GO:0006890; ER to Golgi vesicle-mediated transport GO:0006888; vacuole fusion, non-autophagic GO:0042144; cell redox homeostasis GO:0045454; disulfide oxidoreductase activity GO:0015036; vacuole inheritance GO:0000011; cytosol GO:0005829; fungal-type vacuole GO:0000324; nucleus GO:0005634; Golgi membrane GO:0000139; deoxyribonucleotide biosynthet…
GRE2	67.904	277.272	4.08329	up	3-methylbutanal reductase and NADPH-dependent methylglyoxal reductase	cytoplasm GO:0005737; nucleus GO:0005634; oxidation-reduction process GO:0055114; oxidoreductase activity, acting on the CH-OH group of donors, NAD or NADP as acceptor GO:0016616; steroid biosynthetic process GO:0006694; 3-beta-hydroxy-delta5-steroid dehydrogenase activity GO:0003854; ergosterol metabolic process GO:0008204; methylglyoxal reductase (NADPH-dependent) activity GO:0043892; oxidoredu…

## Sheet: GO Slim T15 52 Non ESR genes 
GOID	GO term	Frequency	Genome Frequency	Gene(s)
8150	biological process unknown	10 out of 52 genes, 19.2%	1133 of 6433 genes, 17.6%	FMP23,HBN1,YGR161W-C,YJL133C-A,YKL071W,YKL107W,YLR108C,CIS1,ART10,YOL131W
42221	response to chemical	6 out of 52 genes, 11.5%	446 of 6433 genes, 6.9%	YCR102C,MXR1,SRX1,NCE103,YNR064C,CIN5
6811	ion transport	6 out of 52 genes, 11.5%	263 of 6433 genes, 4.1%	CCC2,BTN2,MPC3,MUP3,MRS4,YCT1
6520	cellular amino acid metabolic process	5 out of 52 genes, 9.6%	199 of 6433 genes, 3.1%	STR3,MET14,MHT1,MET17,MET2
6457	protein folding	4 out of 52 genes, 7.7%	95 of 6433 genes, 1.5%	MDJ1,BTN2,HSP82,CUR1
6979	response to oxidative stress	4 out of 52 genes, 7.7%	105 of 6433 genes, 1.6%	MXR1,SRX1,HMX1,NCE103
51321	meiotic cell cycle	4 out of 52 genes, 7.7%	282 of 6433 genes, 4.4%	RFA1,RAD51,RIM4,SMA1
6974	cellular response to DNA damage stimulus	3 out of 52 genes, 5.8%	307 of 6433 genes, 4.8%	RFA1,PLM2,HUG1
7005	mitochondrion organization	3 out of 52 genes, 5.8%	265 of 6433 genes, 4.1%	MDJ1,ATG16,HSP82
55086	nucleobase-containing small molecule metabolic process	3 out of 52 genes, 5.8%	198 of 6433 genes, 3.1%	RNR4,RNR3,RNR2
6310	DNA recombination	3 out of 52 genes, 5.8%	185 of 6433 genes, 2.9%	RFA1,RAD51,RIM4
48285	organelle fission	3 out of 52 genes, 5.8%	302 of 6433 genes, 4.7%	RFA1,RAD51,RIM4
6873	cellular ion homeostasis	3 out of 52 genes, 5.8%	128 of 6433 genes, 2%	CCC2,TIS11,HMX1
6865	amino acid transport	3 out of 52 genes, 5.8%	42 of 6433 genes, 0.7%	BTN2,MUP3,YCT1
32200	telomere organization	3 out of 52 genes, 5.8%	78 of 6433 genes, 1.2%	RFA1,RAD51,HSP82
5975	carbohydrate metabolic process	2 out of 52 genes, 3.8%	198 of 6433 genes, 3.1%	IGD1,PYC1
6091	generation of precursor metabolites and energy	2 out of 52 genes, 3.8%	154 of 6433 genes, 2.4%	RGI1,IGD1
43934	sporulation	2 out of 52 genes, 3.8%	133 of 6433 genes, 2.1%	RIM4,SMA1
55085	transmembrane transport	2 out of 52 genes, 3.8%	234 of 6433 genes, 3.6%	CCC2,MPC3
6605	protein targeting	2 out of 52 genes, 3.8%	307 of 6433 genes, 4.8%	ATG16,HSP82
51603	proteolysis involved in cellular protein catabolic process	2 out of 52 genes, 3.8%	216 of 6433 genes, 3.4%	DDI1,MDJ1
51186	cofactor metabolic process	2 out of 52 genes, 3.8%	179 of 6433 genes, 2.8%	RNR4,HMX1
51604	protein maturation	2 out of 52 genes, 3.8%	52 of 6433 genes, 0.8%	YPS1,HSP82
6260	DNA replication	2 out of 52 genes, 3.8%	139 of 6433 genes, 2.2%	RFA1,RIM4
9408	response to heat	2 out of 52 genes, 3.8%	73 of 6433 genes, 1.1%	MDJ1,CUR1
6970	response to osmotic stress	2 out of 52 genes, 3.8%	92 of 6433 genes, 1.4%	CIN5,HSP82
71554	cell wall organization or biogenesis	1 out of 52 genes, 1.9%	198 of 6433 genes, 3.1%	YPS1
51726	regulation of cell cycle	1 out of 52 genes, 1.9%	233 of 6433 genes, 3.6%	HUG1
51052	regulation of DNA metabolic process	1 out of 52 genes, 1.9%	107 of 6433 genes, 1.7%	HSP82
33043	regulation of organelle organization	1 out of 52 genes, 1.9%	283 of 6433 genes, 4.4%	HSP82
6497	protein lipidation	1 out of 52 genes, 1.9%	45 of 6433 genes, 0.7%	ATG16
6281	DNA repair	1 out of 52 genes, 1.9%	256 of 6433 genes, 4%	RFA1
746	conjugation	1 out of 52 genes, 1.9%	124 of 6433 genes, 1.9%	YPS1
6366	transcription from RNA polymerase II promoter	1 out of 52 genes, 1.9%	476 of 6433 genes, 7.4%	CIN5
16197	endosomal transport	1 out of 52 genes, 1.9%	102 of 6433 genes, 1.6%	BTN2
6401	RNA catabolic process	1 out of 52 genes, 1.9%	132 of 6433 genes, 2.1%	TIS11
70271	protein complex biogenesis	1 out of 52 genes, 1.9%	293 of 6433 genes, 4.6%	HSP82
6897	endocytosis	1 out of 52 genes, 1.9%	97 of 6433 genes, 1.5%	SDS24
23052	signaling	1 out of 52 genes, 1.9%	245 of 6433 genes, 3.8%	YPS1
70647	protein modification by small protein conjugation or removal	1 out of 52 genes, 1.9%	170 of 6433 genes, 2.6%	RFA1
	can not be mapped to a GO slim term	4 out of 52 genes, 7.7%		AAD4,LSO1,GTT2,OYE3

## Sheet: Go Slim T30 51 Non ESR genes 
Up-Regulated
GOID	GO term	Frequency	Genome Frequency	Gene(s)
8150	biological process unknown	13 out of 50 genes, 26%	1133 of 6433 genes, 17.6%	YBL100W-C,FMP23,YBR085C-A,HBN1,UGX2,FMP52,YGR053C,SPG1,YHR140W,YJL133C-A,YKL071W,YKL107W,YPR015C
6873	cellular ion homeostasis	6 out of 50 genes, 12%	128 of 6433 genes, 2%	CCC2,SIT1,YPI1,TIS11,HMX1,IZH4
7005	mitochondrion organization	5 out of 50 genes, 10%	265 of 6433 genes, 4.1%	ATG8,SDH6,COX23,MEF2,HSP82
5975	carbohydrate metabolic process	4 out of 50 genes, 8%	198 of 6433 genes, 3.1%	SOR2,YPI1,PYC1,XYL2
43934	sporulation	4 out of 50 genes, 8%	133 of 6433 genes, 2.1%	RIM4,SPS100,SPS19,SPO24
55086	nucleobase-containing small molecule metabolic process	4 out of 50 genes, 8%	198 of 6433 genes, 3.1%	RNR4,RNR3,RNR2,BNA2
70271	protein complex biogenesis	4 out of 50 genes, 8%	293 of 6433 genes, 4.6%	SDH6,ECM29,COX23,HSP82
55085	transmembrane transport	3 out of 50 genes, 6%	234 of 6433 genes, 3.6%	CCC2,SIT1,MPC3
51186	cofactor metabolic process	3 out of 50 genes, 6%	179 of 6433 genes, 2.8%	RNR4,BNA2,HMX1
6811	ion transport	3 out of 50 genes, 6%	263 of 6433 genes, 4.1%	CCC2,MPC3,ENB1
6520	cellular amino acid metabolic process	3 out of 50 genes, 6%	199 of 6433 genes, 3.1%	GDH3,ARG3,BNA2
51321	meiotic cell cycle	3 out of 50 genes, 6%	282 of 6433 genes, 4.4%	RIM4,SPS100,SPS19
6413	translational initiation	2 out of 50 genes, 4%	61 of 6433 genes, 0.9%	DBP1,IMT4
51726	regulation of cell cycle	2 out of 50 genes, 4%	233 of 6433 genes, 3.6%	YPI1,HUG1
51052	regulation of DNA metabolic process	2 out of 50 genes, 4%	107 of 6433 genes, 1.7%	UFD1,HSP82
42221	response to chemical	2 out of 50 genes, 4%	446 of 6433 genes, 6.9%	YDL124W,UFD1
33043	regulation of organelle organization	2 out of 50 genes, 4%	283 of 6433 genes, 4.4%	YPI1,HSP82
6605	protein targeting	2 out of 50 genes, 4%	307 of 6433 genes, 4.8%	ATG8,HSP82
51603	proteolysis involved in cellular protein catabolic process	2 out of 50 genes, 4%	216 of 6433 genes, 3.4%	DDI1,UFD1
6401	RNA catabolic process	2 out of 50 genes, 4%	132 of 6433 genes, 2.1%	UFD1,TIS11
6979	response to oxidative stress	2 out of 50 genes, 4%	105 of 6433 genes, 1.6%	YDL124W,HMX1
48285	organelle fission	2 out of 50 genes, 4%	302 of 6433 genes, 4.7%	YPI1,RIM4
71554	cell wall organization or biogenesis	1 out of 50 genes, 2%	198 of 6433 genes, 3.1%	SPS100
6974	cellular response to DNA damage stimulus	1 out of 50 genes, 2%	307 of 6433 genes, 4.8%	HUG1
7033	vacuole organization	1 out of 50 genes, 2%	88 of 6433 genes, 1.4%	ATG8
6457	protein folding	1 out of 50 genes, 2%	95 of 6433 genes, 1.5%	HSP82
6091	generation of precursor metabolites and energy	1 out of 50 genes, 2%	154 of 6433 genes, 2.4%	YPI1
7059	chromosome segregation	1 out of 50 genes, 2%	203 of 6433 genes, 3.2%	YPI1
32787	monocarboxylic acid metabolic process	1 out of 50 genes, 2%	140 of 6433 genes, 2.2%	SPS19
32543	mitochondrial translation	1 out of 50 genes, 2%	167 of 6433 genes, 2.6%	MEF2
31399	regulation of protein modification process	1 out of 50 genes, 2%	111 of 6433 genes, 1.7%	YPI1
278	mitotic cell cycle	1 out of 50 genes, 2%	319 of 6433 genes, 5%	YPI1
6629	lipid metabolic process	1 out of 50 genes, 2%	296 of 6433 genes, 4.6%	SPS19
6470	protein dephosphorylation	1 out of 50 genes, 2%	49 of 6433 genes, 0.8%	YPI1
51604	protein maturation	1 out of 50 genes, 2%	52 of 6433 genes, 0.8%	HSP82
48193	Golgi vesicle transport	1 out of 50 genes, 2%	191 of 6433 genes, 3%	ATG8
6260	DNA replication	1 out of 50 genes, 2%	139 of 6433 genes, 2.2%	RIM4
6310	DNA recombination	1 out of 50 genes, 2%	185 of 6433 genes, 2.9%	RIM4
70925	organelle assembly	1 out of 50 genes, 2%	135 of 6433 genes, 2.1%	ATG8
23052	signaling	1 out of 50 genes, 2%	245 of 6433 genes, 3.8%	TFS1
32200	telomere organization	1 out of 50 genes, 2%	78 of 6433 genes, 1.2%	HSP82
6970	response to osmotic stress	1 out of 50 genes, 2%	92 of 6433 genes, 1.4%	HSP82
61025	membrane fusion	1 out of 50 genes, 2%	76 of 6433 genes, 1.2%	ATG8
	can not be mapped to a GO slim term	3 out of 50 genes, 6%		STF1,LSO1,FIT2
Down-regulated
GOID	GO term	Frequency	Genome Frequency	Gene(s)
DNA recombination		1 out of 2 genes, 50%	185 of 6433 genes, 2.9%	HO
